# Supplementary material
Source: publisher figshare collection journal article supplement (https://f1000.figshare.com/ndownloader/files/3570896)
Supplement: Supplementary file 1 [file 3570896]

Replicate	CONTROL	IGF-I	H	H+I
n1	1	0.783	1.606	1.232
n2	1	0.708	1.479	1.28
n3	1	1.015	1.687	1.377
MEAN	1	0.835	1.591	1.296
SEM	0	0.092	0.061	0.043
